# Supplementary material for: Week Long Topography Study of Young Adults Using Electronic Cigarettes in Their Natural Environment
Source: PLoS One. 2016 Oct 13;11(10):e0164038. doi: 10.1371/journal.pone.0164038 (PMC5063505; doi:10.1371/journal.pone.0164038)
Supplement: S9 File — This data file contains the flow rate and cumulative volume vs. time for Participant 9, as shown graphically in Figs 3 and 5, respectively. (CSV) [file pone.0164038.s009.csv]

Time [sec]	Mean Pluff Flow Rate [mL/sec]	Flow Rate [mL/sec]	Accumulated Volume [ml]
1.038	0	0	0
1.042	0	0	0
1.048	0	0	0
1.052	0	0	0
1.056	0	0	0
1.064	0	0	0
1.075	0	0	0
1.083	0	0	0
1.091	0	0	0
1.099	0	0	0
1.107	0	0	0
1.118	0	0	0
1.126	0	0	0
1.134	0	0	0
1.142	0	0	0
1.15	0	0	0
1.159	0	0	0
1.169	0	0	0
1.177	0	0	0
1.185	0	0	0
1.193	0	0	0
1.202	0	0	0
1.212	0	0	0
1.22	0	0	0
1.228	0	0	0
1.236	0	0	0
1.245	0	0	0
1.255	0	0	0
1.263	0	0	0
1.271	0	0	0
1.28	0	0	0
1.288	0	0	0
1.296	0	0	0
1.306	0	0	0
1.314	0	0	0
1.323	0	0	0
1.331	0	0	0
1.339	0	0	0
1.349	0	0	0
1.357	0	0	0
1.366	0	0	0
1.374	0	0	0
1.382	0	0	0
1.392	0	0	0
1.4	0	0	0
1.409	0	0	0
1.417	0	0	0
1.425	0	0	0
1.435	0	0	0
1.443	0	0	0
1.452	0	0	0
1.46	0	0	0
1.468	0	0	0
1.476	0	0	0
1.486	0	0	0
1.495	0	0	0
1.503	0	0	0
1.511	0	0	0
1.519	0	0	0
1.529	0	0	0
1.538	0	0	0
1.55	41.9427	22.542928	0.2516562
1.576	41.9427	26.184293	1.3421664
1.601	41.9427	29.260215	2.3907339
1.626	41.9427	31.252937	3.4393014
1.65	41.9427	32.65462	4.4459262
1.675	41.9427	34.175443	5.4944937
1.701	41.9427	36.087784	6.5850039
1.726	41.9427	38.220577	7.6335715
1.751	41.9427	40.261887	8.682139
1.775	41.9427	41.897335	9.6887638
1.8	41.9427	42.91293	10.737331
1.826	41.9427	43.391973	11.827841
1.851	41.9427	43.431654	12.876409
1.875	41.9427	43.073203	13.883034
1.9	41.9427	42.973102	14.931601
1.925	41.9427	43.747812	15.980169
1.951	41.9427	44.625	17.070679
1.976	41.9427	44.567058	18.119247
2	41.9427	43.806838	19.125871
2.025	41.9427	43.391973	20.174439
2.05	41.9427	43.944256	21.223006
2.076	41.9427	44.932762	22.313517
2.101	41.9427	45.485274	23.362084
2.125	41.9427	45.598751	24.368709
2.15	41.9427	45.560957	25.417276
2.177	41.9427	45.276494	26.549729
2.201	41.9427	44.894407	27.556354
2.226	41.9427	44.817599	28.604922
2.25	41.9427	45.143132	29.611546
2.275	41.9427	45.485274	30.660114
2.301	41.9427	45.485274	31.750624
2.326	41.9427	45.523131	32.799192
2.351	41.9427	45.918746	33.847759
2.375	41.9427	46.255152	34.854384
2.4	41.9427	46.236527	35.902951
2.426	41.9427	45.918746	36.993462
2.451	41.9427	45.504207	38.042029
2.476	41.9427	45.523131	39.090597
2.5	41.9427	46.068563	40.097221
2.525	41.9427	46.105941	41.145789
2.551	41.9427	45.181276	42.236299
2.576	41.9427	44.58638	43.284867
2.6	41.9427	45.181276	44.291492
2.625	41.9427	46.087256	45.340059
2.65	41.9427	46.385317	46.388627
2.676	41.9427	46.199254	47.479137
2.701	41.9427	46.310982	48.527704
2.725	41.9427	46.699923	49.534329
2.75	41.9427	46.348164	50.582897
2.775	41.9427	45.371513	51.631464
2.801	41.9427	44.913589	52.721974
2.826	41.9427	44.913589	53.770542
2.85	41.9427	44.779146	54.777167
2.875	41.9427	44.644297	55.825734
2.902	41.9427	44.702139	56.958187
2.926	41.9427	45.104956	57.964812
2.951	41.9427	45.806062	59.013379
2.975	41.9427	46.105941	60.020004
3	41.9427	45.579858	61.068572
3.026	41.9427	44.990233	62.159082
3.051	41.9427	45.219387	63.207649
3.076	41.9427	45.749616	64.256217
3.1	41.9427	45.485274	65.262842
3.125	41.9427	44.47032	66.311409
3.151	41.9427	43.72812	67.401919
3.176	41.9427	43.747812	68.450487
3.201	41.9427	43.963852	69.499054
3.225	41.9427	43.550483	70.505679
3.25	41.9427	42.529861	71.554247
3.276	41.9427	41.773805	72.644757
3.301	41.9427	41.587821	73.693324
3.325	41.9427	41.608527	74.699949
3.35	41.9427	41.359372	75.748517
3.375	41.9427	40.475253	76.797084
3.401	41.9427	39.593146	77.887594
3.426	41.9427	39.614894	78.936162
3.45	41.9427	40.30465	79.942787
3.475	41.9427	41.087749	80.991354
3.5	41.9427	41.629223	82.039922
3.526	41.9427	41.691248	83.130432
3.551	41.9427	41.587821	84.179
3.575	41.9427	41.525642	85.185624
3.6	41.9427	40.6875	86.234192
3.627	41.9427	38.62409	87.366645
3.651	41.9427	36.420397	88.37327
3.676	41.9427	35.046454	89.421837
3.7	41.9427	33.769786	90.428462
3.725	41.9427	31.308009	91.477029
3.751	41.9427	27.499929	92.56754
3.776	41.9427	23.220495	93.616107
3.801	41.9427	0	94.664675
3.825	0	0	95.167987
3.85	0	0	95.167987
3.876	0	0	95.167987
3.901	0	0	95.167987
3.926	0	0	95.167987
3.95	0	0	95.167987
3.975	0	0	95.167987
4.001	0	0	95.167987
4.026	0	0	95.167987
4.05	0	0	95.167987
4.075	0	0	95.167987
4.1	0	0	95.167987
4.126	0	0	95.167987
4.151	0	0	95.167987
4.175	0	0	95.167987
4.2	0	0	95.167987
4.225	0	0	95.167987
4.251	0	0	95.167987
4.276	0	0	95.167987
4.3	0	0	95.167987
4.325	0	0	95.167987
4.352	0	0	95.167987
4.376	0	0	95.167987
4.401	0	0	95.167987
4.425	0	0	95.167987
4.45	0	0	95.167987
4.476	0	0	95.167987
4.501	0	0	95.167987
4.526	0	0	95.167987
4.55	0	0	95.167987
4.575	0	0	95.167987
4.601	0	0	95.167987
4.626	0	0	95.167987
4.651	0	0	95.167987
4.675	0	0	95.167987
4.7	0	0	95.167987
4.726	0	0	95.167987
4.751	0	0	95.167987
4.775	0	0	95.167987
4.8	0	0	95.167987
4.825	0	0	95.167987
4.851	0	0	95.167987
4.876	0	0	95.167987
4.9	0	0	95.167987
4.925	0	0	95.167987
4.95	0	0	95.167987
4.976	0	0	95.167987
5.001	0	0	95.167987
5.025	0	0	95.167987
5.05	0	0	95.167987
5.076	0	0	95.167987
5.101	0	0	95.167987
5.126	0	0	95.167987
5.15	0	0	95.167987
5.175	0	0	95.167987
5.201	0	0	95.167987
5.226	0	0	95.167987
5.251	0	0	95.167987
5.275	0	0	95.167987
5.3	0	0	95.167987
5.326	0	0	95.167987
5.351	0	0	95.167987
5.376	0	0	95.167987
5.4	0	0	95.167987
5.425	0	0	95.167987
5.451	0	0	95.167987
5.476	0	0	95.167987
5.5	0	0	95.167987
5.525	0	0	95.167987
5.55	0	0	95.167987
5.576	0	0	95.167987
5.601	0	0	95.167987
5.625	0	0	95.167987
5.65	0	0	95.167987
5.675	0	0	95.167987
5.701	0	0	95.167987
5.726	0	0	95.167987
5.75	0	0	95.167987
5.775	0	0	95.167987
5.801	0	0	95.167987
5.826	0	0	95.167987
5.851	0	0	95.167987
5.875	0	0	95.167987
5.9	0	0	95.167987
5.926	0	0	95.167987
5.951	0	0	95.167987
5.976	0	0	95.167987
6	0	0	95.167987
6.025	0	0	95.167987
6.051	0	0	95.167987
6.076	0	0	95.167987
6.1	0	0	95.167987
6.125	0	0	95.167987
6.15	0	0	95.167987
6.176	0	0	95.167987
6.201	0	0	95.167987
6.225	0	0	95.167987
6.25	0	0	95.167987
6.275	0	0	95.167987
6.301	0	0	95.167987
6.326	0	0	95.167987
6.35	0	0	95.167987
6.375	0	0	95.167987
6.4	0	0	95.167987
6.426	0	0	95.167987
6.451	0	0	95.167987
6.475	0	0	95.167987
6.5	0	0	95.167987
6.526	0	0	95.167987
6.551	0	0	95.167987
6.576	0	0	95.167987
6.6	0	0	95.167987
6.625	0	0	95.167987
6.651	0	0	95.167987
6.676	0	0	95.167987
6.701	0	0	95.167987
6.725	0	0	95.167987
6.75	0	0	95.167987
6.776	0	0	95.167987
6.801	0	0	95.167987
6.825	0	0	95.167987
6.85	0	0	95.167987
6.875	0	0	95.167987
6.901	0	0	95.167987
6.926	0	0	95.167987
6.95	0	0	95.167987
6.975	0	0	95.167987
7	0	0	95.167987
7.026	0	0	95.167987
7.051	0	0	95.167987
7.075	0	0	95.167987
7.1	0	0	95.167987
7.127	0	0	95.167987
7.151	0	0	95.167987
7.176	0	0	95.167987
7.2	0	0	95.167987
7.225	0	0	95.167987
7.251	0	0	95.167987
7.276	0	0	95.167987
7.301	0	0	95.167987
7.325	0	0	95.167987
7.35	0	0	95.167987
7.376	0	0	95.167987
7.401	0	0	95.167987
7.426	0	0	95.167987
7.45	0	0	95.167987
7.475	0	0	95.167987
7.501	0	0	95.167987
7.526	0	0	95.167987
7.55	0	0	95.167987
7.575	0	0	95.167987
7.6	0	0	95.167987
7.626	0	0	95.167987
7.651	0	0	95.167987
7.675	0	0	95.167987
7.7	0	0	95.167987
7.725	0	0	95.167987
7.751	0	0	95.167987
7.776	0	0	95.167987
7.8	0	0	95.167987
7.825	0	0	95.167987
7.852	0	0	95.167987
7.876	0	0	95.167987
7.901	0	0	95.167987
7.925	0	0	95.167987
7.95	0	0	95.167987
7.976	0	0	95.167987
8.001	0	0	95.167987
8.026	0	0	95.167987
8.05	0	0	95.167987
8.075	0	0	95.167987
8.101	0	0	95.167987
8.126	0	0	95.167987
8.151	0	0	95.167987
8.175	0	0	95.167987
8.2	0	0	95.167987
8.226	0	0	95.167987
8.251	0	0	95.167987
8.275	0	0	95.167987
8.3	0	0	95.167987
8.325	0	0	95.167987
8.351	0	0	95.167987
8.376	0	0	95.167987
8.4	0	0	95.167987
8.425	0	0	95.167987
8.45	0	0	95.167987
8.476	0	0	95.167987
8.501	0	0	95.167987
8.525	0	0	95.167987
8.55	0	0	95.167987
8.577	0	0	95.167987
8.601	0	0	95.167987
8.626	0	0	95.167987
8.65	0	0	95.167987
8.675	0	0	95.167987
8.701	0	0	95.167987
8.726	0	0	95.167987
8.751	0	0	95.167987
8.775	0	0	95.167987
8.8	0	0	95.167987
8.826	0	0	95.167987
8.851	0	0	95.167987
8.876	0	0	95.167987
8.9	0	0	95.167987
8.925	0	0	95.167987
8.951	0	0	95.167987
8.976	0	0	95.167987
9	0	0	95.167987
9.025	0	0	95.167987
9.05	0	0	95.167987
9.076	0	0	95.167987
9.101	0	0	95.167987
9.125	0	0	95.167987
9.15	0	0	95.167987
9.175	0	0	95.167987
9.201	0	0	95.167987
9.226	0	0	95.167987
9.25	0	0	95.167987
9.275	0	0	95.167987
9.302	0	0	95.167987
9.326	0	0	95.167987
9.351	0	0	95.167987
9.375	0	0	95.167987
9.4	0	0	95.167987
9.426	0	0	95.167987
9.451	0	0	95.167987
9.476	0	0	95.167987
9.5	0	0	95.167987
9.525	0	0	95.167987
9.551	0	0	95.167987
9.576	0	0	95.167987
9.601	0	0	95.167987
9.625	0	0	95.167987
9.65	0	0	95.167987
9.676	0	0	95.167987
9.701	0	0	95.167987
9.725	0	0	95.167987
9.75	0	0	95.167987
9.775	0	0	95.167987
9.801	0	0	95.167987
9.826	0	0	95.167987
9.85	0	0	95.167987
9.875	0	0	95.167987
9.9	0	0	95.167987
9.926	0	0	95.167987
9.951	0	0	95.167987
9.975	0	0	95.167987
10	0	0	95.167987
10.027	0	0	95.167987
10.051	0	0	95.167987
10.076	0	0	95.167987
10.1	0	0	95.167987
10.125	0	0	95.167987
10.151	0	0	95.167987
10.176	0	0	95.167987
10.201	0	0	95.167987
10.225	0	0	95.167987
10.25	0	0	95.167987
10.276	0	0	95.167987
10.301	0	0	95.167987
10.326	0	0	95.167987
10.35	0	0	95.167987
10.375	0	0	95.167987
10.401	0	0	95.167987
10.426	0	0	95.167987
10.45	0	0	95.167987
10.475	0	0	95.167987
10.5	0	0	95.167987
10.526	0	0	95.167987
10.551	0	0	95.167987
10.575	0	0	95.167987
10.6	0	0	95.167987
10.625	0	0	95.167987
10.651	0	0	95.167987
10.676	0	0	95.167987
10.7	0	0	95.167987
10.725	0	0	95.167987
10.752	0	0	95.167987
10.776	0	0	95.167987
10.801	0	0	95.167987
10.825	0	0	95.167987
10.85	0	0	95.167987
10.876	0	0	95.167987
10.901	0	0	95.167987
10.926	0	0	95.167987
10.95	0	0	95.167987
10.975	0	0	95.167987
11.001	0	0	95.167987
11.026	0	0	95.167987
11.051	0	0	95.167987
11.075	0	0	95.167987
11.1	0	0	95.167987
11.126	0	0	95.167987
11.151	0	0	95.167987
11.175	0	0	95.167987
11.2	0	0	95.167987
11.225	0	0	95.167987
11.251	0	0	95.167987
11.276	0	0	95.167987
11.3	0	0	95.167987
11.325	0	0	95.167987
11.35	0	0	95.167987
11.376	0	0	95.167987
11.401	0	0	95.167987
11.425	0	0	95.167987
11.45	0	0	95.167987
11.476	0	0	95.167987
11.501	0	0	95.167987
11.526	0	0	95.167987
11.55	0	0	95.167987
11.575	0	0	95.167987
11.601	0	0	95.167987
11.626	0	0	95.167987
11.651	0	0	95.167987
11.675	0	0	95.167987
11.7	0	0	95.167987
11.726	0	0	95.167987
11.751	0	0	95.167987
11.776	0	0	95.167987
11.8	0	0	95.167987
11.825	0	0	95.167987
11.851	0	0	95.167987
11.876	0	0	95.167987
11.9	0	0	95.167987
11.925	0	0	95.167987
11.95	0	0	95.167987
11.976	0	0	95.167987
12.001	0	0	95.167987
12.025	43.102348	20.501905	95.685215
12.05	43.102348	25.075277	96.762774
12.075	43.102348	29.201282	97.840333
12.101	43.102348	32.917333	98.960994
12.126	43.102348	35.968248	100.03855
12.15	43.102348	38.265622	101.07301
12.175	43.102348	40.197656	102.15057
12.201	43.102348	42	103.27123
12.226	43.102348	43.59002	104.34879
12.251	43.102348	44.932762	105.42635
12.275	43.102348	45.787254	106.4608
12.3	43.102348	46.105941	107.53836
12.326	43.102348	46.459534	108.65902
12.351	43.102348	46.847242	109.73658
12.376	43.102348	46.975767	110.81414
12.4	43.102348	47.32286	111.8486
12.425	43.102348	47.955668	112.92615
12.451	43.102348	48.367005	114.04682
12.476	43.102348	48.54476	115.12437
12.5	43.102348	48.61568	116.15883
12.525	43.102348	48.54476	117.23639
12.55	43.102348	48.473736	118.31395
12.576	43.102348	48.455964	119.43461
12.601	43.102348	48.188594	120.51217
12.625	43.102348	47.721605	121.54662
12.65	43.102348	47.468246	122.62418
12.675	43.102348	47.231767	123.70174
12.701	43.102348	46.736796	124.8224
12.726	43.102348	46.42244	125.89996
12.75	43.102348	46.77364	126.93442
12.775	43.102348	47.359249	128.01198
12.8	43.102348	47.25	129.08953
12.826	43.102348	46.718363	130.2102
12.851	43.102348	46.810456	131.28775
12.875	43.102348	47.359249	132.32221
12.9	43.102348	47.377432	133.39977
12.926	43.102348	46.515119	134.52043
12.951	43.102348	45.579858	135.59799
12.976	43.102348	45.466334	136.67555
13	43.102348	45.824862	137.71
13.025	43.102348	46.143289	138.78756
13.051	43.102348	46.292379	139.90822
13.076	43.102348	46.031155	140.98578
13.101	43.102348	45.542048	142.06334
13.125	43.102348	45.238431	143.0978
13.15	43.102348	45.428429	144.17536
13.176	43.102348	45.956246	145.29602
13.201	43.102348	45.843654	146.37358
13.225	43.102348	44.85602	147.40803
13.25	43.102348	44.159335	148.48559
13.275	43.102348	44.58638	149.56315
13.301	43.102348	45.352525	150.68381
13.326	43.102348	45.295514	151.76137
13.35	43.102348	44.702139	152.79583
13.375	43.102348	44.353956	153.87338
13.4	43.102348	44.198328	154.95094
13.426	43.102348	44.198328	156.0716
13.451	43.102348	44.509041	157.14916
13.475	43.102348	45.085856	158.18362
13.5	43.102348	45.655384	159.26118
13.527	43.102348	45.749616	160.42494
13.551	43.102348	45.314526	161.4594
13.576	43.102348	44.817599	162.53696
13.6	43.102348	44.971084	163.57141
13.625	43.102348	45.993716	164.64897
13.651	43.102348	47.012424	165.76963
13.676	43.102348	47.377432	166.84719
13.701	43.102348	47.140498	167.92475
13.725	43.102348	46.440991	168.95921
13.75	43.102348	45.598751	170.03676
13.776	43.102348	44.951927	171.15743
13.801	43.102348	44.702139	172.23498
13.826	43.102348	44.817599	173.31254
13.85	43.102348	44.779146	174.347
13.875	43.102348	44.237286	175.42456
13.901	43.102348	43.609775	176.54522
13.926	43.102348	43.133151	177.62278
13.95	43.102348	42.326853	178.65723
13.975	43.102348	41.171516	179.73479
14	43.102348	40.581515	180.81235
14.026	43.102348	41.129654	181.93301
14.051	43.102348	41.876772	183.01057
14.075	43.102348	41.649908	184.04503
14.1	43.102348	40.898646	185.12259
14.125	43.102348	40.729817	186.20015
14.151	43.102348	40.623942	187.32081
14.176	43.102348	39.353119	188.39836
14.2	43.102348	37.285166	189.43282
14.225	43.102348	35.193605	190.51038
14.252	43.102348	32.864958	191.67414
14.276	43.102348	30.329828	192.7086
14.301	43.102348	27.687218	193.78616
14.325	43.102348	24.868325	194.82061
14.35	43.102348	22.389573	195.89817
14.376	43.102348	0	197.01883
14.401	0	0	197.55761
14.426	0	0	197.55761
14.45	0	0	197.55761
14.475	0	0	197.55761
14.501	0	0	197.55761
14.526	0	0	197.55761
14.551	0	0	197.55761
14.575	0	0	197.55761
14.6	0	0	197.55761
14.626	0	0	197.55761
14.651	0	0	197.55761
14.675	0	0	197.55761
14.7	0	0	197.55761
14.725	0	0	197.55761
14.751	0	0	197.55761
14.776	0	0	197.55761
14.8	0	0	197.55761
14.825	0	0	197.55761
14.85	0	0	197.55761
14.876	0	0	197.55761
14.901	0	0	197.55761
14.925	0	0	197.55761
14.95	0	0	197.55761
14.977	0	0	197.55761
15.001	0	0	197.55761
15.026	0	0	197.55761
15.05	0	0	197.55761
15.075	0	0	197.55761
15.101	0	0	197.55761
15.126	0	0	197.55761
15.151	0	0	197.55761
15.175	0	0	197.55761
15.2	0	0	197.55761
15.226	0	0	197.55761
15.251	0	0	197.55761
15.276	0	0	197.55761
15.3	0	0	197.55761
15.325	0	0	197.55761
15.351	0	0	197.55761
15.376	0	0	197.55761
15.4	0	0	197.55761
15.425	0	0	197.55761
15.45	0	0	197.55761
15.476	0	0	197.55761
15.501	0	0	197.55761
15.525	0	0	197.55761
15.55	0	0	197.55761
15.575	0	0	197.55761
15.601	0	0	197.55761
15.626	0	0	197.55761
15.65	0	0	197.55761
15.675	0	0	197.55761
15.702	0	0	197.55761
15.726	0	0	197.55761
15.751	0	0	197.55761
15.775	0	0	197.55761
15.8	0	0	197.55761
15.826	0	0	197.55761
15.851	0	0	197.55761
15.876	0	0	197.55761
15.9	0	0	197.55761
15.925	0	0	197.55761
15.951	0	0	197.55761
15.976	0	0	197.55761
16.001	0	0	197.55761
16.025	0	0	197.55761
16.05	0	0	197.55761
16.076	0	0	197.55761
16.101	0	0	197.55761
16.125	0	0	197.55761
16.15	0	0	197.55761
16.175	0	0	197.55761
16.201	0	0	197.55761
16.226	0	0	197.55761
16.25	0	0	197.55761
16.275	0	0	197.55761
16.3	0	0	197.55761
16.326	0	0	197.55761
16.351	0	0	197.55761
16.375	0	0	197.55761
16.4	0	0	197.55761
16.427	0	0	197.55761
16.451	0	0	197.55761
16.476	0	0	197.55761
16.5	0	0	197.55761
16.525	0	0	197.55761
16.551	0	0	197.55761
16.576	0	0	197.55761
16.601	0	0	197.55761
16.625	0	0	197.55761
16.65	0	0	197.55761
16.676	0	0	197.55761
16.701	0	0	197.55761
16.726	0	0	197.55761
16.75	0	0	197.55761
16.775	0	0	197.55761
16.801	0	0	197.55761
16.826	0	0	197.55761
16.85	0	0	197.55761
16.875	0	0	197.55761
16.9	0	0	197.55761
16.926	0	0	197.55761
16.951	0	0	197.55761
16.975	0	0	197.55761
17	0	0	197.55761
17.025	0	0	197.55761
17.051	0	0	197.55761
17.076	0	0	197.55761
17.1	0	0	197.55761
17.125	0	0	197.55761
17.152	0	0	197.55761
17.176	0	0	197.55761
17.201	0	0	197.55761
17.225	0	0	197.55761
17.25	0	0	197.55761
17.276	0	0	197.55761
17.301	0	0	197.55761
17.326	0	0	197.55761
17.35	0	0	197.55761
17.375	0	0	197.55761
17.401	0	0	197.55761
17.426	0	0	197.55761
17.451	0	0	197.55761
17.475	0	0	197.55761
17.5	0	0	197.55761
17.526	0	0	197.55761
17.551	0	0	197.55761
17.575	0	0	197.55761
17.6	0	0	197.55761
17.625	0	0	197.55761
17.651	0	0	197.55761
17.676	0	0	197.55761
17.7	0	0	197.55761
17.725	0	0	197.55761
17.75	0	0	197.55761
17.776	0	0	197.55761
17.801	0	0	197.55761
17.825	0	0	197.55761
17.85	0	0	197.55761
17.876	0	0	197.55761
17.901	0	0	197.55761
17.926	0	0	197.55761
17.95	0	0	197.55761
17.975	0	0	197.55761
18.001	0	0	197.55761
18.026	0	0	197.55761
18.051	0	0	197.55761
18.075	0	0	197.55761
18.1	0	0	197.55761
18.126	0	0	197.55761
18.151	0	0	197.55761
18.176	0	0	197.55761
18.2	0	0	197.55761
18.225	0	0	197.55761
18.251	0	0	197.55761
18.276	0	0	197.55761
18.3	0	0	197.55761
18.325	0	0	197.55761
18.35	0	0	197.55761
18.376	0	0	197.55761
18.401	0	0	197.55761
18.425	0	0	197.55761
18.45	0	0	197.55761
18.475	0	0	197.55761
18.501	0	0	197.55761
18.526	0	0	197.55761
18.55	0	0	197.55761
18.575	0	0	197.55761
18.601	0	0	197.55761
18.626	0	0	197.55761
18.651	0	0	197.55761
18.675	0	0	197.55761
18.7	0	0	197.55761
18.726	0	0	197.55761
18.751	0	0	197.55761
18.776	0	0	197.55761
18.8	0	0	197.55761
18.825	0	0	197.55761
18.851	0	0	197.55761
18.876	0	0	197.55761
18.9	0	0	197.55761
18.925	0	0	197.55761
18.95	0	0	197.55761
18.976	0	0	197.55761
19.001	0	0	197.55761
19.025	0	0	197.55761
19.05	0	0	197.55761
19.075	0	0	197.55761
19.101	0	0	197.55761
19.126	0	0	197.55761
19.15	0	0	197.55761
19.175	0	0	197.55761
19.2	0	0	197.55761
19.226	0	0	197.55761
19.251	0	0	197.55761
19.275	0	0	197.55761
19.3	0	0	197.55761
19.326	0	0	197.55761
19.351	0	0	197.55761
19.376	0	0	197.55761
19.4	0	0	197.55761
19.425	0	0	197.55761
19.451	0	0	197.55761
19.476	0	0	197.55761
19.501	0	0	197.55761
19.525	0	0	197.55761
19.55	0	0	197.55761
19.576	0	0	197.55761
19.601	0	0	197.55761
19.625	0	0	197.55761
19.65	0	0	197.55761
19.675	0	0	197.55761
19.701	0	0	197.55761
19.726	0	0	197.55761
19.75	0	0	197.55761
19.775	0	0	197.55761
19.8	0	0	197.55761
19.826	0	0	197.55761
19.851	0	0	197.55761
19.875	0	0	197.55761
19.9	0	0	197.55761
19.927	0	0	197.55761
19.951	0	0	197.55761
19.976	0	0	197.55761
20	0	0	197.55761
